# Supplementary material for: Obesity in Caucasian Seniors on the Rise: Is It Truly Harmful? Results of the PolSenior2 Study
Source: Nutrients. 2022 Nov 2;14(21):4621. doi: 10.3390/nu14214621 (PMC9658066; doi:10.3390/nu14214621)
Supplement: Supplementary file 1 [file nutrients-14-04621-s001.zip › nutrients-1970384-supplementary.pdf]

**Supplementary Table S1.** The number of PolSenior2 study participants divided into 5-year age cohorts.

| Age (years) | Women (n) | Men (n) | Whole cohort (n) |
|-------------|-----------|---------|------------------|
| 65.0-69.9   | 594       | 525     | 1119             |
| 70.0-74.9   | 512       | 540     | 1052             |
| 75.0-79.9   | 455       | 455     | 910              |
| 80.0-84.9   | 437       | 409     | 846              |
| 85.0-89.9   | 320       | 294     | 614              |
| ≥ 90.0      | 246       | 270     | 516              |
| All         | 2564      | 2493    | 5057             |

**Supplementary Table S2.** General obesity (BMI  $\geq 30.0$  kg/m<sup>2</sup>) frequency in the consecutive age groups, estimated during the implementation of the PolSenior (2008-2009) and PolSenior2 (2018-2019) projects.

| Age (years)    | General obesity % (95% CI) |                    |
|----------------|----------------------------|--------------------|
|                | PolSenior                  | PolSenior2         |
| All            | 37.8 (35.5-40.1)           | 39.9 (37.5-42.4)   |
| 65.0-69.9      | 44.0 (38.4-49.7)           | 41.0 (37.0-45.1)   |
| 70.0-74.9      | 40.9 (35.6-46.1)           | 44.7 (40.1-49.3)   |
| 75.0-79.9      | 33.3 (28.5-38.1)           | 39.3 (34.9-43.7)   |
| 80.0-84.9      | 31.6 (27.1-36.2)           | 37.4 (32.6-42.1)   |
| 85.0-89.9      | 23.3 (18.4-28.1)           | 32.9 (27.9-38.0)** |
| $\geq 90.0$    | 22.7 (12.8-32.6)           | 23.3 (17.3-29.3)   |
| $p \downarrow$ | < 0.001                    | < 0.001            |

CI: confidence interval.  $p \downarrow$  (chi-squared test for trend in proportions):  $p$ -value for age-related differences in the percentage of obese individuals in the consecutive age cohorts. \*\*  $p < 0.01$

**Supplementary Table S3.** Abdominal obesity frequency according to IDF criteria ( $M \geq 94.0$  cm,  $W \geq 80.0$  cm) in the consecutive age groups, estimated during the implementation of the PolSenior (2008-2009) and PolSenior2 (2018-2019) projects.

| Age (years)    | Abdominal obesity % (95% CI) |                  |
|----------------|------------------------------|------------------|
|                | PolSenior                    | PolSenior2       |
| All            | 86.1 (84.3-87.9)             | 87.1 (85.5-88.8) |
| 65.0-69.9      | 87.1 (83.9-90.3)             | 87.2 (84.2-90.2) |
| 70.0-74.9      | 86.5 (83.4-89.6)             | 88.2 (85.3-91.1) |
| 75.0-79.9      | 86.6 (83.8-89.5)             | 86.6 (82.6-90.7) |
| 80.0-84.9      | 86.6 (83.6-89.5)             | 89.3 (87.0-91.6) |
| 85.0-89.9      | 83.0 (80.0-85.9)             | 84.7 (80.4-88.9) |
| $\geq 90.0$    | 74.5 (68.7-80.2)             | 78.7 (74.0-83.4) |
| $p \downarrow$ | $< 0.001$                    | $< 0.001$        |

CI: confidence interval.  $p \downarrow$  (chi-squared test for trend in proportions):  $p$ -value for age-related differences in the percentage of abdominal obesity in the consecutive age cohorts.

**Supplementary Table S4.** The number of PolSenior (2008-2009) and PolSenior2 (2018-2019) study participants, stratified into younger and oldest-old seniors (65.0-84.9 and  $\geq 85.0$  years, respectively), and non-obese and obese according to body mass index (BMI  $< 30.0 \text{ kg/m}^2$  and  $\geq 30.0 \text{ kg/m}^2$ , respectively) whose survival probability was analyzed by the Kaplan-Meier survival curve method.

|       | 65.0-84.9 years |            |           |            | $\geq 85$ years |            |           |            |
|-------|-----------------|------------|-----------|------------|-----------------|------------|-----------|------------|
|       | Non-obese (n)   |            | Obese (n) |            | Non-obese (n)   |            | Obese (n) |            |
|       | PolSenior       | PolSenior2 | PolSenior | PolSenior2 | PolSenior       | PolSenior2 | PolSenior | PolSenior2 |
| Women | 881             | 1117       | 686       | 842        | 476             | 360        | 159       | 157        |
| Men   | 1155            | 1224       | 509       | 675        | 649             | 428        | 109       | 102        |

n: number of study participants

**Supplementary Table S5.** The number of PolSenior (2008-2009) and PolSenior2 (2018-2019) study participants stratified into younger and oldest-old seniors (65.0-84.9 and  $\geq 85.0$  years, respectively), and without or with abdominal obesity according to the International Diabetes Federation criteria (waist circumference [WC]  $< 80.0$  cm in women and  $< 94.0$  cm in men vs. WC  $\geq 80.0$  cm in women and  $\geq 94.0$  cm in men, respectively) whose survival probability was analyzed by the Kaplan-Meier survival curve method.

|       | 65.0-84.9 years |            |                       |            | $\geq 85$ years |            |                       |            |
|-------|-----------------|------------|-----------------------|------------|-----------------|------------|-----------------------|------------|
|       | Non-obese (n)   |            | Abdominal obesity (n) |            | Non-obese (n)   |            | Abdominal obesity (n) |            |
|       | PolSenior       | PolSenior2 | PolSenior             | PolSenior2 | PolSenior       | PolSenior2 | PolSenior             | PolSenior2 |
| Women | 129             | 148        | 1453                  | 1801       | 115             | 65         | 563                   | 463        |
| Men   | 396             | 343        | 1290                  | 1529       | 279             | 161        | 499                   | 374        |

n: number of study participants

**Supplementary Table S6.** The number of PolSenior2 study participants stratified into younger seniors and oldest-old (65.0-84.9 and  $\geq 85.0$  years, respectively), and according to body mass index (BMI) value as underweight (BMI  $< 18.5$  kg/m<sup>2</sup>), normal weight (18.5-24.9 kg/m<sup>2</sup>), overweight (25.0-29.9 kg/m<sup>2</sup>), class 1 obesity (30.0-34.9 kg/m<sup>2</sup>), class 2 obesity (35.0-39.9 kg/m<sup>2</sup>), and class 3 obesity ( $\geq 40.0$  kg/m<sup>2</sup>) whose survival probability was analyzed by the Kaplan-Meier survival curve method.

|           |                   | BMI (kg/m <sup>2</sup> ) |           |           |           |           |             |
|-----------|-------------------|--------------------------|-----------|-----------|-----------|-----------|-------------|
|           |                   | < 18.5                   | 18.5-24.9 | 25.0-29.9 | 30.0-34.9 | 35.0-39.9 | $\geq 40.0$ |
| Women (n) | 65.0-84.9 years   | 18                       | 383       | 716       | 575       | 188       | 79          |
|           | $\geq 85.0$ years | 14                       | 162       | 184       | 115       | 34        | 8           |
| Men (n)   | 65.0-84.9 years   | 20                       | 387       | 818       | 524       | 120       | 30          |
|           | $\geq 85.0$ years | 12                       | 187       | 229       | 81        | 21        | 0           |

n: number of study participants

**Supplementary Table S7.** The number of PolSenior2 study participants stratified into younger and oldest-old seniors (65.0-84.9 and  $\geq 85.0$  years, respectively), and without or with abdominal obesity according to the International Diabetes Federation criteria (waist circumference [WC]  $< 80.0$  cm in women and  $< 94.0$  cm in men *vs.* WC  $\geq 80.0$  cm in women and  $\geq 94.0$  cm in men, respectively), whose survival probability was analyzed by the Kaplan-Meier survival curve method.

|       | 65.0-84.9 years |                       | $\geq 85$ years |                       |
|-------|-----------------|-----------------------|-----------------|-----------------------|
|       | Non-obese (n)   | Abdominal obesity (n) | Non-obese (n)   | Abdominal obesity (n) |
| Women | 148             | 1801                  | 65              | 463                   |
| Men   | 343             | 1529                  | 161             | 374                   |

n: number of study participants

**Supplementary Table S8.** Frequency of aging-related diseases in the PolSenior2 study participants, stratified into younger and oldest-old seniors (65.0-84.9 and  $\geq 85.0$  years, respectively).

|       |             | Aging-related disease (%) |          |      |      |      |        |
|-------|-------------|---------------------------|----------|------|------|------|--------|
|       | Age (years) | n                         | Diabetes | CVD  | COPD | CKD  | Cancer |
| Women | 65.0-84.9   | 1998                      | 44.3     | 34.8 | 3.3  | 20.0 | 9.2    |
|       | $\geq 85.0$ | 566                       | 46.5     | 55.0 | 3.5  | 54.9 | 8.6    |
| Men   | 65.0-84.9   | 1929                      | 53.4     | 43.3 | 6.5  | 21.6 | 9.9    |
|       | $\geq 85.0$ | 564                       | 46.8     | 59.8 | 6.6  | 54.3 | 10.7   |

**Supplementary Table S9.** Use of drugs with anti-aging potential in the PolSenior2 study participants stratified into younger and oldest-old seniors (65.0-84.9 and  $\geq 85.0$  years, respectively).

|           |             | Drugs with anti-aging potential (%) |         |
|-----------|-------------|-------------------------------------|---------|
|           | Age (years) | Metformin                           | Statins |
| Non-obese | 65.0-84.9   | 13.9                                | 41.1    |
|           | $\geq 85.0$ | 10.7                                | 35.3    |
| Obese     | 65.0-84.9   | 27.3                                | 48.1    |
|           | $\geq 85.0$ | 19.2                                | 42.0    |
